# Supplementary material for: Stochasticity in the miR-9/Hes1 oscillatory network can account for clonal heterogeneity in the timing of differentiation
Source: eLife. 2016 Oct 4;5:e16118. doi: 10.7554/eLife.16118 (PMC5050025; doi:10.7554/eLife.16118)
Supplement: Figure 1—source data 5. — DOI: http://dx.doi.org/10.7554/eLife.16118.007 [file elife-16118-fig1-data5.xlsx]

## Sheet: Sheet1
Sample ID	miR9 CT	miR CT Ave	log10 Copy No.	Copy No.		Total cell count	Total RNA (ng)	ng/cell	No. of cells in RT rxn	cells used in PCR (1ul of 15ul RT)	Copy No./cell			Sample ID	CT	Log10 copy no.
C17 exp.1A	23.5651		4.75033	56276.7		419625	34030	0.0810962	632.335	42.1557	1334.97	SD		100	33.4633	2
C17 exp.1A	23.5147		4.76433	58120.7		419625	34030	0.0810962	632.335	42.1557	1378.72	41.0796		1000	29.6837	3
C17 exp.1A	23.6359		4.73068	53787.4		419625	34030	0.0810962	632.335	42.1557	1275.92	SE		10000	26.6121	4
C17 exp.1A	23.5277		4.76072	57640		419625	34030	0.0810962	632.335	42.1557	1367.31	13.6932		100000	22.5132	5
C17 exp.1A	23.4728		4.77595	59696.1		419625	34030	0.0810962	632.335	42.1557	1416.09
C17 exp.1A	23.5233		4.76193	57800.3		419625	34030	0.0810962	632.335	42.1557	1371.12
C17 exp.1A	23.5264		4.76108	57687.8		419625	34030	0.0810962	632.335	42.1557	1368.45
C17 exp.1A	23.5761		4.74728	55883.3		419625	34030	0.0810962	632.335	42.1557	1325.64
C17 exp.1A	23.5932		4.74252	55274.2		419625	34030	0.0810962	632.335	42.1557	1311.19
C17 exp.1A	23.5077	23.5443	4.76626	58379.3	57054.6	419625	34030	0.0810962	632.335	42.1557	1384.85	1353.43
C17 exp.1B	23.6032		4.73976	54923.1		419625	30680	0.0731129	695.363	46.3575	1184.77	SD
C17 exp.1B	23.4767		4.77486	59547.7		419625	30680	0.0731129	695.363	46.3575	1284.53	57.4545
C17 exp.1B	23.7502		4.69895	49998		419625	30680	0.0731129	695.363	46.3575	1078.53	SE
C17 exp.1B	23.5233		4.76194	57801.6		419625	30680	0.0731129	695.363	46.3575	1246.87	19.1515
C17 exp.1B	23.6563		4.72502	53091.2		419625	30680	0.0731129	695.363	46.3575	1145.26
C17 exp.1B	23.6304		4.73219	53975.1		419625	30680	0.0731129	695.363	46.3575	1164.32
C17 exp.1B	23.6419		4.729	53579.4		419625	30680	0.0731129	695.363	46.3575	1155.79
C17 exp.1B	23.5499		4.75455	56826.8		419625	30680	0.0731129	695.363	46.3575	1225.84
C17 exp.1B	23.6017		4.74016	54974.1		419625	30680	0.0731129	695.363	46.3575	1185.87
C17 exp.1B	23.6169	23.6051	4.73594	54442.6	54916	419625	30680	0.0731129	695.363	46.3575	1174.41	1184.62
C17 exp.1C	24.0149		4.62546	42213.9		419625	33620	0.0801192	668.005	44.5337	947.91	SD
C17 exp.1C	23.536		4.7584	57332.8		419625	33620	0.0801192	668.005	44.5337	1287.4	120.371
C17 exp.1C	23.7701		4.69342	49365.4		419625	33620	0.0801192	668.005	44.5337	1108.5	SE
C17 exp.1C	23.4811		4.77364	59380.4		419625	33620	0.0801192	668.005	44.5337	1333.38	40.1236
C17 exp.1C	23.4789		4.77426	59464.2		419625	33620	0.0801192	668.005	44.5337	1335.26
C17 exp.1C	23.7394		4.70195	50343.9		419625	33620	0.0801192	668.005	44.5337	1130.47
C17 exp.1C	23.5623		4.75112	56378.9		419625	33620	0.0801192	668.005	44.5337	1265.98
C17 exp.1C	23.6155		4.73633	54491.9		419625	33620	0.0801192	668.005	44.5337	1223.61
C17 exp.1C	23.5449		4.75593	57007.5		419625	33620	0.0801192	668.005	44.5337	1280.1
C17 exp.1C	23.6288	23.6372	4.73263	54029.7	54000.9	419625	33620	0.0801192	668.005	44.5337	1213.23	1212.59
Sample ID	miR9 CT	miR CT Ave	log10 Copy No.	Copy No.		Total cell count	Total RNA (ng)	ng/cell	No. of cells in RT rxn	cells used in PCR (1ul of 15ul RT)	Copy No./cell			Sample ID	CT	Log10 copy no.
C17 exp.2A	23.9041		4.62855	42516.1		244375	14304	0.058533	851.827	56.7885	748.675	SD		100	34.0236	2
C17 exp.2A	23.9394		4.61929	41619.2		244375	14304	0.058533	851.827	56.7885	732.881	56.4714		1000	29.7925	3
C17 exp.2A	23.9289		4.62206	41884.8		244375	14304	0.058533	851.827	56.7885	737.558	SE		10000	26.5432	4
C17 exp.2A	23.9875		4.60667	40427.1		244375	14304	0.058533	851.827	56.7885	711.888	18.8238		100000	22.4359	5
C17 exp.2A	23.8304		4.64792	44454.5		244375	14304	0.058533	851.827	56.7885	782.808
C17 exp.2A	24.011		4.60052	39858.5		244375	14304	0.058533	851.827	56.7885	701.877
C17 exp.2A	23.8535		4.64184	43837.4		244375	14304	0.058533	851.827	56.7885	771.941
C17 exp.2A	23.9097		4.62709	42372.8		244375	14304	0.058533	851.827	56.7885	746.152
C17 exp.2A	24.2894		4.52746	33686.5		244375	14304	0.058533	851.827	56.7885	593.192
C17 exp.2A	23.8139	23.9468	4.65222	44897.8	41555.5	244375	14304	0.058533	851.827	56.7885	790.614	731.759
C17 exp.2B	24.2		4.55092	35556.3		244375	18242	0.0746476	645.701	43.0467	825.993	SD
C17 exp.2B	23.8051		4.65454	45137.5		244375	18242	0.0746476	645.701	43.0467	1048.57	96.8149
C17 exp.2B	23.9184		4.62482	42152.7		244375	18242	0.0746476	645.701	43.0467	979.23	SE
C17 exp.2B	23.7633		4.6655	46291.1		244375	18242	0.0746476	645.701	43.0467	1075.37	32.2716
C17 exp.2B	23.5817		4.71316	51660.1		244375	18242	0.0746476	645.701	43.0467	1200.09
C17 exp.2B	23.7838		4.66012	45721.7		244375	18242	0.0746476	645.701	43.0467	1062.14
C17 exp.2B	23.9196		4.6245	42120.7		244375	18242	0.0746476	645.701	43.0467	978.488
C17 exp.2B	23.801		4.65562	45249.7		244375	18242	0.0746476	645.701	43.0467	1051.18
C17 exp.2B	23.9577		4.61449	41161.4		244375	18242	0.0746476	645.701	43.0467	956.203
C17 exp.2B	23.8758	23.8607	4.63599	43250.8	43830.2	244375	18242	0.0746476	645.701	43.0467	1004.74	1018.2
C17 exp.2C	23.8527		4.64206	43859.3		244375	23596	0.0965565	503.643	33.5762	1306.26	SD
C17 exp.2C	23.8045		4.65469	45153.5		244375	23596	0.0965565	503.643	33.5762	1344.81	49.0378
C17 exp.2C	23.7285		4.67464	47276.2		244375	23596	0.0965565	503.643	33.5762	1408.03	SE
C17 exp.2C	23.6849		4.68608	48538.2		244375	23596	0.0965565	503.643	33.5762	1445.61	16.3459
C17 exp.2C	23.7702		4.66369	46098.9		244375	23596	0.0965565	503.643	33.5762	1372.96
C17 exp.2C	23.8072		4.65399	45080.9		244375	23596	0.0965565	503.643	33.5762	1342.64
C17 exp.2C	23.7797		4.6612	45835		244375	23596	0.0965565	503.643	33.5762	1365.1
C17 exp.2C	23.744		4.67057	46834.7		244375	23596	0.0965565	503.643	33.5762	1394.88
C17 exp.2C	23.7856		4.65965	45672.4		244375	23596	0.0965565	503.643	33.5762	1360.26
C17 exp.2C	23.8926	23.785	4.63159	42814.6	45716.4	244375	23596	0.0965565	503.643	33.5762	1275.15	1361.57
Sample ID	miR9 CT 1	miR CT Ave	log10 Copy No.	Copy No.		Total cell count	Total RNA (ng)	ng/cell	No. of cells in RT rxn	cells used in PCR (1ul of 15ul RT)	Copy No./cell
C17 exp.3A	23.9124		4.62638	42303.6		356875	22814	0.0639271	738.81	49.254	858.886	SD
C17 exp.3A	23.7529		4.66824	46584.5		356875	22814	0.0639271	738.81	49.254	945.802	32.3767
C17 exp.3A	23.8099		4.65327	45005.9		356875	22814	0.0639271	738.81	49.254	913.752	SE
C17 exp.3A	23.7834		4.66024	45734		356875	22814	0.0639271	738.81	49.254	928.535	10.7922
C17 exp.3A	23.8782		4.63536	43188.2		356875	22814	0.0639271	738.81	49.254	876.846
C17 exp.3A	23.9514		4.61615	41318.8		356875	22814	0.0639271	738.81	49.254	838.893
C17 exp.3A	23.8291		4.64825	44488.7		356875	22814	0.0639271	738.81	49.254	903.251
C17 exp.3A	23.8415		4.64498	44155.2		356875	22814	0.0639271	738.81	49.254	896.479
C17 exp.3A	23.801		4.65562	45250.1		356875	22814	0.0639271	738.81	49.254	918.71
C17 exp.3A	23.8268	23.8387	4.64884	44549.4	44257.8	356875	22814	0.0639271	738.81	49.254	904.483	898.564
C17 exp.3B	23.7183		4.67731	47567.3		356875	26688	0.0747825	643.6	42.9067	1108.62	SD
C17 exp.3B	23.7459		4.67009	46782.8		356875	26688	0.0747825	643.6	42.9067	1090.34	36.5964
C17 exp.3B	23.7053		4.68072	47943		356875	26688	0.0747825	643.6	42.9067	1117.38	SE
C17 exp.3B	23.6636		4.69167	49166.2		356875	26688	0.0747825	643.6	42.9067	1145.89	12.1988
C17 exp.3B	23.7117		4.67906	47759.5		356875	26688	0.0747825	643.6	42.9067	1113.1
C17 exp.3B	23.8278		4.64858	44522.1		356875	26688	0.0747825	643.6	42.9067	1037.65
C17 exp.3B	23.7076		4.68013	47877.8		356875	26688	0.0747825	643.6	42.9067	1115.86
C17 exp.3B	23.6801		4.68735	48680.1		356875	26688	0.0747825	643.6	42.9067	1134.56
C17 exp.3B	23.6182		4.70359	50534.6		356875	26688	0.0747825	643.6	42.9067	1177.78
C17 exp.3B	23.7263	23.7105	4.67522	47338.9	47817.2	356875	26688	0.0747825	643.6	42.9067	1103.3	1114.45
C17 exp.3C	23.7113		4.67915	47768.9		356875	24476	0.0685842	696.953	46.4635	1028.09	SD
C17 exp.3C	23.6234		4.70222	50376.1		356875	24476	0.0685842	696.953	46.4635	1084.21	39.6344
C17 exp.3C	23.653		4.69445	49482.1		356875	24476	0.0685842	696.953	46.4635	1064.97	SE
C17 exp.3C	23.5367		4.72497	53084.4		356875	24476	0.0685842	696.953	46.4635	1142.49	13.2115
C17 exp.3C	23.7294		4.67441	47250.6		356875	24476	0.0685842	696.953	46.4635	1016.94
C17 exp.3C	23.6087		4.70606	50823.5		356875	24476	0.0685842	696.953	46.4635	1093.84
C17 exp.3C	23.6926		4.68406	48312.6		356875	24476	0.0685842	696.953	46.4635	1039.8
C17 exp.3C	23.5908		4.71078	51378.1		356875	24476	0.0685842	696.953	46.4635	1105.77
C17 exp.3C	23.5829		4.71286	51624.6		356875	24476	0.0685842	696.953	46.4635	1111.08
C17 exp.3C	23.6355	23.6364	4.69905	50009.2	50011	356875	24476	0.0685842	696.953	46.4635	1076.31	1076.35
											Total mean	stdev
											1105.72	204.001
											std error	21.5036
