# Supplementary material for: Stochasticity in the miR-9/Hes1 oscillatory network can account for clonal heterogeneity in the timing of differentiation
Source: eLife. 2016 Oct 4;5:e16118. doi: 10.7554/eLife.16118 (PMC5050025; doi:10.7554/eLife.16118)
Supplement: Figure 2—source data 1. — DOI: http://dx.doi.org/10.7554/eLife.16118.014 [file elife-16118-fig2-data1.xlsx]

## Sheet: fig2 -FCS molecules per nuc 
FCS molecule number per nucleus
	UbC-VENUS:HES1	Hes1pr-VENUS:HES1
	9375.01	721.492
	2248.06	1922.33
	2700.22	1403.38
	4173.47	1673.51
	3387.12	1220.48
	3164.44	1190.32
	4934.69	901.973
	6874.03	1737.45
	6860.94	2072.26
	5505.64	1465.51
	5278.06	2032.53
	4657.47	1072.14
	5694.47	5122.95
	4980.87	1416.51
	5622.71	527.313
	7178.11	3717.59
	3902.07	1318.1
	3315.77	1253.19
	6764.09	774.157
	3904.79	619.866
	5429.3	1185.04
	6817.75	1614.48
	6015.1	2544.24
	5531.72	591.974
	4782.44	1004.13
	4425.49	976.629
	3194.19	1253.63
	5119.31	2490
	9380.26	1348.12
	5267.4	1639.53
	6053.87	831.114
	6794.04	1050.99
	3026.85	1142.06
	3753.36	15529.2
	5075.95	1272.13
	3762.15	1631.43
	6803.73	1143.11
	2880.36	1256.7
	5201.94	1545.22
	6004.8	1607.88
	2660.31	1126.79
	2981.3	1942.49
	4589.96	1463.98
	2381.33	759.897
	5307.56	2874.9
	6803.34	1742.86
	6195.26	1564.02
	5120.18	1653.59
	7506.54	3486.68
	4193.37	2802.17
	8778.48	2772.91
	4161.17	3072.66
	2994.21	2478.49
	3398.12	2609.01
	3674.67	2617.71
	2552.22	3224.91
	4572.91	2399.93
	4678.43	2898.64
	3726.51	1953.24
	6171.14	2723.76
	5320.8	3755.72
	7145.75	1948.61
	3063.59	1943.37
	3871.48	4049.77
	7765.52	2255.69
	9174.57	2996.61
	3564.73	2606.08
	5160.89	1377.49
	5250.67	4270.6
	5198.05	4135.6
	5858.47	3017.6
	1952.95	3830.65
	3227.13	2509.77
	2740.42	6968.37
	3043.18	3151.26
	5572.39	2754.12
	6448.55	2676.41
	1415.48	4270.65
	3753.44	2486.1
	4157.91	2236.33
	4354.32	3509.61
	2892.71	3514.48
	5891.49	3724.79
	3529.19	7876.7
	3104.04	1734
	4064.92	3481.24
	2963.31	2726.26
	3184.95	2722.09
	4654.1	2730.12
	7295.45	4707.45
	4460.9	3580.78
	5527.28	3101.32
	2803.09	922.721
	6627.59	3469.61
	5146.33	1921.71
	4961.52	1362.08
	2507.05	3327.91
	3714.84	2180.17
	3540.12
	5184.39
	2687.98
	4547.51
	3663.03
	2918.9
	4929.01
	3736.98
	3041.95
	2264.46
	3798.19
	4750.77
	5138.43
	2921.35
	2332.72
	2708.12
	2800.47
	2005.06
	2331.57
	3070.58
	1785.52
	1201.87
	3321
	1983.12
	2564.81
	3534.28
	2819.33
	1661
	2725.43
	2150.36
	2181.61
	2717.54
	1956.9
	2098.89
	2308.06
	2005.95
	2096.33
	2383.18
	1712.91
	2081.51
	1955.04
	3829.4
	2146.54
	1916.7
	1498.53
	1426.86
	1774.94
	965.988
	2277.97
	1849.99
	2347.16
	1938.71
	3684.14
	3896.29
	3614.29
	2300.61
	2921.9
	1075.29
	1643.7
	2334.83
	3409.56
	2960.32
	2284.19
	3026.85
	4567.12
	2619.05
	3050.42
	3465.94
	2421.48
	3129.61
	1840.81
	2685.07
	2105.19
	2309.65
	2469.69
	2485.54
	4733.19
	2632.11
	2052.47
	4089.47
	2042.11
	1493.59
	1572.22
	1266.74
	1993.05
	2886.09
	2304.99
	3016.36
	2143.25
	3766.31
	2262.44
	2129.37
	3881.38
	2776.35
	3293.01
	3079.71
	2834.84
	3521.09
	3841.75
	2629.18
	2725.66
	2410.35
	3454.81
	2230.11
	3519.27
	1686.55
	2439.93
	1825.21
	3860.13
	5218.21
	1867.79
	2679.19
	2986.73
	1356.76
	1427.62
	4983.02
	2390.34
	2093.79
	2475.86
	2862.22
	1888.64
	3234.83
	3927.26
	5307.31
	1932.5
	2727.14
	2239.51
	1319.15
	2457.94
	3206.9
	5063.66
	1988.12
	1879.76
	1334.46
	2070.06
	2665.68

## Sheet: fig2 - Western Quantification
Blot	2016-08-03	2016-08-09	2016-08-09	2016-08-15	2016-08-15		AVERAGE	ST DEV
Sample	Cerys 3xT75 1/8/16- DMSO lane	Fresh thaw p11.24 2xT75 lysates made 7/8/16	p11.26 lysates made 7/8/16 from 1xT75	p11.25 lysates made 5/8/16 from Veronica(also given to Tom?)	Cerys 3 x T75 3/8/16
% of Venus-Hes1 positive cells	22.64% from 53 cells	37.59% from 407 cells	41.94% from 217 cells	40.79% from 554 cells	0.22
Hes1 Blot - Endogenous-Hes1 / Venus- Hes1	2.87	0.11	0.1	0.03	15		3.622	6.47429
Ratio Norm. to % pos cells	0.6601	0.0418	0.042	0.0123	3.3		0.81124	1.41764
				FCS UbC Venus-Hes1 number 3660	3660
				Endogenous Hes1 corrected by western blot	2928

## Sheet: Fig2-Supp 1
A. Example Count rate - UbC-VENUS:HES1	Time (s)	Count rate KHz			B. Example Autocorrelation - UbC-VENUS:HES1		Lag Time (s)	Data	Lag Time (s)	Fit
	0	0.5					2e-07	0.577013	1e-06	0.528827
	0.01	0.6					4e-07	0.694322	1.2e-06	0.528497
	0.02	0.6					6e-07	0.646752	1.4e-06	0.528168
	0.03	1					8e-07	0.562497	1.6e-06	0.527839
	0.04	1.3					1e-06	0.41939	1.8e-06	0.52751
	0.05	0.5					1.2e-06	0.514532	2e-06	0.527183
	0.06	0.4					1.4e-06	0.892652	2.2e-06	0.526855
	0.07	0.3					1.6e-06	0.42557	2.4e-06	0.526529
	0.08	0.6					1.8e-06	0.554503	2.6e-06	0.526202
	0.09	0.6					2e-06	0.618799	2.8e-06	0.525876
	0.1	1.2					2.2e-06	0.654009	3e-06	0.525551
	0.11	1					2.4e-06	0.673627	3.2e-06	0.525226
	0.12	0.9					2.6e-06	0.505118	3.6e-06	0.524578
	0.13	0.6					2.8e-06	0.437193	4e-06	0.523932
	0.14	1					3e-06	0.362011	4.4e-06	0.523288
	0.15	0.7					3.2e-06	0.331507	4.8e-06	0.522646
	0.16	1.5					3.6e-06	0.471692	5.2e-06	0.522006
	0.17	0.6					4e-06	0.498936	5.6e-06	0.521368
	0.18	0.7					4.4e-06	0.667642	6e-06	0.520732
	0.19	1.4					4.8e-06	0.610433	6.4e-06	0.520098
	0.2	0.6					5.2e-06	0.487483	7.2e-06	0.518835
	0.21	0.6					5.6e-06	0.443542	8e-06	0.51758
	0.22	1.3					6e-06	0.685247	8.8e-06	0.516333
	0.23	1.8					6.4e-06	0.402861	9.6e-06	0.515094
	0.24	1.3					7.2e-06	0.519442	1.04e-05	0.513862
	0.25	1.5					8e-06	0.567664	1.12e-05	0.512638
	0.26	0.7					8.8e-06	0.45044	1.2e-05	0.511421
	0.27	0.8					9.6e-06	0.457258	1.28e-05	0.510212
	0.28	1.5					1.04e-05	0.540604	1.44e-05	0.507816
	0.29	1.7					1.12e-05	0.41421	1.6e-05	0.505449
	0.3	0.7					1.2e-05	0.542051	1.76e-05	0.50311
	0.31	2					1.28e-05	0.468782	1.92e-05	0.500801
	0.32	1.3					1.44e-05	0.460374	2.08e-05	0.498519
	0.33	1.3					1.6e-05	0.41992	2.24e-05	0.496266
	0.34	1.2					1.76e-05	0.47063	2.4e-05	0.49404
	0.35	1.6					1.92e-05	0.607831	2.56e-05	0.49184
	0.36	0.8					2.08e-05	0.510538	2.88e-05	0.487522
	0.37	0.4					2.24e-05	0.510771	3.2e-05	0.483307
	0.38	1					2.4e-05	0.52861	3.52e-05	0.479194
	0.39	1.7					2.56e-05	0.481168	3.84e-05	0.475179
	0.4	0.8					2.88e-05	0.465164	4.16e-05	0.471261
	0.41	2.8					3.2e-05	0.494267	4.48e-05	0.467436
	0.42	0.7					3.52e-05	0.441376	4.8e-05	0.463703
	0.43	0.7					3.84e-05	0.548902	5.12e-05	0.460058
	0.44	1.5					4.16e-05	0.496468	5.76e-05	0.453027
	0.45	1					4.48e-05	0.451117	6.4e-05	0.446324
	0.46	0.7					4.8e-05	0.479806	7.04e-05	0.439932
	0.47	0.5					5.12e-05	0.473591	7.68e-05	0.433837
	0.48	1					5.76e-05	0.419628	8.32e-05	0.428022
	0.49	0.6					6.4e-05	0.447947	8.96e-05	0.422474
	0.5	0.7					7.04e-05	0.431826	9.6e-05	0.417179
	0.51	1.2					7.68e-05	0.409788	0.0001024	0.412123
	0.52	1.2					8.32e-05	0.434489	0.0001152	0.402684
	0.53	0.9					8.96e-05	0.380532	0.000128	0.394066
	0.54	0.4					9.6e-05	0.406146	0.0001408	0.386188
	0.55	0.6					0.0001024	0.418803	0.0001536	0.378975
	0.56	0.8					0.0001152	0.402058	0.0001664	0.372364
	0.57	0.8					0.000128	0.38384	0.0001792	0.366293
	0.58	0.7					0.0001408	0.372513	0.000192	0.360711
	0.59	0.8					0.0001536	0.391361	0.0002048	0.355568
	0.6	0.4					0.0001664	0.401562	0.0002304	0.346434
	0.61	0.8					0.0001792	0.364635	0.000256	0.338595
	0.62	1.1					0.000192	0.376691	0.0002816	0.33181
	0.63	0.9					0.0002048	0.384164	0.0003072	0.325886
	0.64	1.7					0.0002304	0.352179	0.0003328	0.320665
	0.65	0.6					0.000256	0.335011	0.0003584	0.316019
	0.66	0.5					0.0002816	0.339947	0.000384	0.311845
	0.67	0.7					0.0003072	0.33932	0.0004096	0.308059
	0.68	0.3					0.0003328	0.327582	0.0004608	0.301392
	0.69	0.7					0.0003584	0.313717	0.000512	0.295613
	0.7	1					0.000384	0.321916	0.0005632	0.290453
	0.71	0.7					0.0004096	0.310371	0.0006144	0.285738
	0.72	0.4					0.0004608	0.303931	0.0006656	0.281348
	0.73	0.9					0.000512	0.291666	0.0007168	0.277207
	0.74	0.7					0.0005632	0.292084	0.000768	0.27326
	0.75	1.1					0.0006144	0.292616	0.0008192	0.269472
	0.76	0.8					0.0006656	0.282436	0.0009216	0.262282
	0.77	1.5					0.0007168	0.253098	0.001024	0.255513
	0.78	0.5					0.000768	0.257092	0.0011264	0.2491
	0.79	1.7					0.0008192	0.246946	0.0012288	0.243
	0.8	0.2					0.0009216	0.252094	0.0013312	0.237187
	0.81	0.5					0.001024	0.250435	0.0014336	0.231637
	0.82	1.2					0.0011264	0.245512	0.001536	0.226332
	0.83	0.7					0.0012288	0.237961	0.0016384	0.221256
	0.84	1.4					0.0013312	0.233695	0.0018432	0.211733
	0.85	3.8					0.0014336	0.221382	0.002048	0.202965
	0.86	1.8					0.001536	0.21845	0.0022528	0.194867
	0.87	1.2					0.0016384	0.204701	0.0024576	0.187363
	0.88	0.6					0.0018432	0.206538	0.0026624	0.180392
	0.89	0.8					0.002048	0.20606	0.0028672	0.173899
	0.9	0.6					0.0022528	0.197273	0.003072	0.167836
	0.91	1					0.0024576	0.195493	0.0032768	0.162163
	0.92	0.4					0.0026624	0.188891	0.0036864	0.151843
	0.93	0.8					0.0028672	0.178982	0.004096	0.142698
	0.94	0.5					0.003072	0.177963	0.0045056	0.13454
	0.95	0.8					0.0032768	0.171232	0.0049152	0.127218
	0.96	1.2					0.0036864	0.16191	0.0053248	0.120609
	0.97	0.6					0.004096	0.157913	0.0057344	0.114616
	0.98	0.8					0.0045056	0.146529	0.006144	0.109157
	0.99	0.6					0.0049152	0.140664	0.0065536	0.104163
	1	0.7					0.0053248	0.131667	0.0073728	0.0953552
	1.01	0.4					0.0057344	0.124611	0.008192	0.0878348
	1.02	0.5					0.006144	0.113955	0.0090112	0.081341
	1.03	0.5					0.0065536	0.113245	0.0098304	0.0756789
	1.04	0.3					0.0073728	0.102159	0.0106496	0.0706998
	1.05	0.3					0.008192	0.0913523	0.0114688	0.0662884
	1.06	0.5					0.0090112	0.0825714	0.012288	0.062354
	1.07	0.7					0.0098304	0.0767259	0.0131072	0.0588242
	1.08	1.9					0.0106496	0.0781397	0.0147456	0.0527548
	1.09	0.4					0.0114688	0.0740571	0.016384	0.0477276
	1.1	0.3					0.012288	0.0601954	0.0180224	0.043499
	1.11	0.3					0.0131072	0.057343	0.0196608	0.0398958
	1.12	1					0.0147456	0.0520372	0.0212992	0.0367913
	1.13	0.4					0.016384	0.0451313	0.0229376	0.0340905
	1.14	0.3					0.0180224	0.0385447	0.024576	0.0317212
	1.15	0.4					0.0196608	0.0237218	0.0262144	0.0296273
	1.16	1.9					0.0212992	0.0206321	0.0294912	0.0260974
	1.17	2.5					0.0229376	0.0199117	0.032768	0.0232421
	1.18	1.4					0.024576	0.0187846	0.0360448	0.0208894
	1.19	1.4					0.0262144	0.0110684	0.0393216	0.0189208
	1.2	0.4					0.0294912	0.0103504	0.0425984	0.017252
	1.21	0.3					0.032768	0.00035441	0.0458752	0.0158214
	1.22	2.5					0.0360448	0.00348115	0.049152	0.0145831
	1.23	1.7					0.0393216	-0.000348475	0.0524288	0.0135021
	1.24	1.6					0.0425984	0.00672949	0.0589824	0.0117092
	1.25	1.5					0.0458752	0.00480402	0.065536	0.0102873
	1.26	1.2					0.049152	0.012175	0.0720896	0.00913587
	1.27	0.5					0.0524288	0.0161564	0.0786432	0.0081871
	1.28	2.9					0.0589824	0.0242693	0.0851968	0.00739387
	1.29	1.6					0.065536	0.00327067	0.0917504	0.00672235
	1.3	0.7					0.0720896	0.00414662	0.098304	0.00614766
	1.31	0.5					0.0786432	-0.00848329	0.104858	0.00565119
	1.32	0.7					0.0851968	-0.0241749	0.117965	0.00483907
	1.33	0.5					0.0917504	-0.0185588	0.131072	0.00420559
	1.34	1.1					0.098304	-0.00530524	0.144179	0.00369992
	1.35	2.2					0.104858	0.00904077	0.157286	0.00328852
	1.36	1.3					0.117965	0.0146489	0.170394	0.0029484
	1.37	0.5					0.131072	0.0116161	0.183501	0.00266333
	1.38	2.8					0.144179	-0.0145746	0.196608	0.00242156
	1.39	0.7					0.157286	-0.00671687	0.209715	0.00221439
	1.4	1.8					0.170394	0.0165376	0.23593	0.00187907
	1.41	0.8					0.183501	0.00288265	0.262144	0.00162075
	1.42	1.2					0.196608	-0.00744391	0.288358	0.00141673
	1.43	0.9					0.209715	-0.00530478	0.314573	0.00125225
	1.44	0.6					0.23593	-0.0149314	0.340787	0.00111734
	1.45	0.8					0.262144	-0.0033603	0.367002	0.00100506
	1.46	0.7					0.288358	-0.0202479
	1.47	0.8					0.314573	0.00719282
	1.48	1.2					0.340787	7.7725e-05
	1.49	0.6					0.367002	-2.0945e-05
	1.5	0.4					0.393216	0.00165974
	1.51	0.9					0.41943	0.00711395
	1.52	2
	1.53	1.5
	1.54	0.6
	1.55	0.7
	1.56	1.7
	1.57	1.3
	1.58	0.6
	1.59	0.4
	1.6	0.5
	1.61	0.5
	1.62	1.7
	1.63	0.4
	1.64	0.2
	1.65	0.6
	1.66	0.8
	1.67	0.5
	1.68	0.5
	1.69	0.6
	1.7	2
	1.71	0.4
	1.72	1.4
	1.73	0.7
	1.74	0.8
	1.75	1.1
	1.76	0.6
	1.77	0.7
	1.78	3.9
	1.79	1.5
	1.8	0.9
	1.81	0.6
	1.82	0.8
	1.83	0.7
	1.84	0.7
	1.85	0.9
	1.86	1.1
	1.87	0.8
	1.88	0.9
	1.89	0.4
	1.9	1
	1.91	0.8
	1.92	0.5
	1.93	1.1
	1.94	0.3
	1.95	1.9
	1.96	0.2
	1.97	1.3
	1.98	1.8
	1.99	0.9
	2	0.4
	2.01	0.7
	2.02	0.7
	2.03	0.6
	2.04	0.3
	2.05	0.8
	2.06	1.2
	2.07	0.6
	2.08	1.2
	2.09	0.6
	2.1	0.7
	2.11	1.4
	2.12	0.5
	2.13	1.2
	2.14	1.3
	2.15	1.5
	2.16	1.6
	2.17	0.3
	2.18	0.4
	2.19	0.8
	2.2	0.2
	2.21	0.4
	2.22	0.5
	2.23	0.8
	2.24	1.3
	2.25	1.3
	2.26	0.9
	2.27	1.3
	2.28	0.8
	2.29	0.3
	2.3	0.2
	2.31	0.7
	2.32	0.4
	2.33	0.6
	2.34	0.7
	2.35	1
	2.36	0.7
	2.37	0.5
	2.38	1.5
	2.39	0.8
	2.4	1.5
	2.41	0.2
	2.42	0.4
	2.43	0.7
	2.44	0.7
	2.45	0.4
	2.46	0.2
	2.47	1.3
	2.48	0.6
	2.49	0.5
	2.5	0.9
	2.51	0.5
	2.52	0.6
	2.53	1
	2.54	0.5
	2.55	0.8
	2.56	1
	2.57	1.2
	2.58	1.4
	2.59	0.6
	2.6	0.7
	2.61	0.5
	2.62	0.5
	2.63	1.1
	2.64	0.3
	2.65	0.6
	2.66	0.8
	2.67	1.7
	2.68	1.3
	2.69	1
	2.7	0.9
	2.71	1.5
	2.72	0.9
	2.73	0.4
	2.74	1.3
	2.75	1.9
	2.76	0.7
	2.77	1.3
	2.78	0.5
	2.79	0.8
	2.8	1.1
	2.81	1.5
	2.82	1.2
	2.83	1.2
	2.84	1.5
	2.85	1.1
	2.86	0.8
	2.87	1.7
	2.88	0.7
	2.89	0.9
	2.9	1
	2.91	0.5
	2.92	0.8
	2.93	1.1
	2.94	0.8
	2.95	0.9
	2.96	0.5
	2.97	0.8
	2.98	0.8
	2.99	0.8
	3	1.4
	3.01	0.7
	3.02	0.8
	3.03	1.2
	3.04	1.3
	3.05	1.2
	3.06	1.6
	3.07	0.9
	3.08	2.3
	3.09	1.3
	3.1	1.3
	3.11	1
	3.12	2.5
	3.13	0.9
	3.14	2.8
	3.15	0.6
	3.16	0.3
	3.17	0.7
	3.18	0.7
	3.19	1.4
	3.2	0.8
	3.21	0.4
	3.22	0.9
	3.23	0.5
	3.24	0.6
	3.25	5.2
	3.26	1.5
	3.27	0.7
	3.28	0.7
	3.29	1.3
	3.3	0.5
	3.31	0.6
	3.32	1
	3.33	1.5
	3.34	1.3
	3.35	2
	3.36	1.2
	3.37	0.4
	3.38	1
	3.39	1
	3.4	0.8
	3.41	1.4
	3.42	1.2
	3.43	0.6
	3.44	0.8
	3.45	1.9
	3.46	2.7
	3.47	0.6
	3.48	0.4
	3.49	0.7
	3.5	1
	3.51	0.7
	3.52	1.4
	3.53	1.2
	3.54	1
	3.55	0.8
	3.56	2.4
	3.57	1.8
	3.58	1
	3.59	1.3
	3.6	0.7
	3.61	3.4
	3.62	0.8
	3.63	1.4
	3.64	0.4
	3.65	0.8
	3.66	1.1
	3.67	0.4
	3.68	0.9
	3.69	0.3
	3.7	0.5
	3.71	1.1
	3.72	1.7
	3.73	2.2
	3.74	1.7
	3.75	0.4
	3.76	3.2
	3.77	0.6
	3.78	2.3
	3.79	4.4
	3.8	0.3
	3.81	0.2
	3.82	1.8
	3.83	0.2
	3.84	2.6
	3.85	1.1
	3.86	1.5
	3.87	1
	3.88	1
	3.89	2.8
	3.9	2.7
	3.91	5.1
	3.92	1.2
	3.93	0.6
	3.94	0.6
	3.95	0.7
	3.96	0.9
	3.97	0.9
	3.98	0.8
	3.99	0.7
	4	0.5
	4.01	0.9
	4.02	0.6
	4.03	1.1
	4.04	0.3
	4.05	0.5
	4.06	0.2
	4.07	0.9
	4.08	1.1
	4.09	0.6
	4.1	0.9
	4.11	0.8
	4.12	0.7
	4.13	0.7
	4.14	0.7
	4.15	1
	4.16	0.6
	4.17	1
	4.18	0.4
	4.19	1.4
	4.2	0.4
	4.21	0.9
	4.22	0.6
	4.23	0.3
	4.24	0.3
	4.25	1.3
	4.26	0.3
	4.27	0.6
	4.28	0.9
	4.29	0.8
	4.3	0.9
	4.31	0.3
	4.32	0.9
	4.33	0.8
	4.34	0.5
	4.35	0.6
	4.36	1
	4.37	0.7
	4.38	0.2
	4.39	0.5
	4.4	0.4
	4.41	0.8
	4.42	0.7
	4.43	0.4
	4.44	0.5
	4.45	0.3
	4.46	0.1
	4.47	0.2
	4.48	0.3
	4.49	0.2
	4.5	1.1
	4.51	0.9
	4.52	0.8
	4.53	0.7
	4.54	0.7
	4.55	0.7
	4.56	0.6
	4.57	0.5
	4.58	0.4
	4.59	0.8
	4.6	0.9
	4.61	0.8
	4.62	2.1
	4.63	0.6
	4.64	1
	4.65	0.6
	4.66	0.6
	4.67	1.1
	4.68	0.4
	4.69	1
	4.7	0.5
	4.71	0.5
	4.72	0.3
	4.73	0.5
	4.74	0.5
	4.75	0.1
	4.76	0.4
	4.77	0.6
	4.78	1.3
	4.79	0.5
	4.8	1.1
	4.81	2.4
	4.82	1.5
	4.83	0.4
	4.84	1.2
	4.85	0.4
	4.86	0.7
	4.87	0.3
	4.88	0.2
	4.89	0.4
	4.9	2.3
	4.91	0.6
	4.92	1.1
	4.93	0.7
	4.94	0.5
	4.95	0.1
	4.96	0.6
	4.97	1
	4.98	0.6
	4.99	2.7
	5	2.1
	5.01	1
	5.02	0.5
	5.03	0.7
	5.04	1.6
	5.05	0.5
	5.06	0.5
	5.07	0.9
	5.08	0.5
	5.09	1.1
	5.1	0.5
	5.11	1.1
	5.12	1.2
	5.13	0.8
	5.14	4.3
	5.15	1.7
	5.16	0.4
	5.17	0.7
	5.18	0.5
	5.19	0.9
	5.2	0.3
	5.21	0.6
	5.22	1
	5.23	0.1
	5.24	1.4
	5.25	0.7
	5.26	0.4
	5.27	0.4
	5.28	0.2
	5.29	0.2
	5.3	0.2
	5.31	0.2
	5.32	0.9
	5.33	1.8
	5.34	1.4
	5.35	0.8
	5.36	1.2
	5.37	0.4
	5.38	0.6
	5.39	1.1
	5.4	1
	5.41	0.4
	5.42	0.5
	5.43	0.9
	5.44	2.4
	5.45	0.4
	5.46	0.6
	5.47	0.2
	5.48	1.1
	5.49	0.5
	5.5	0.8
	5.51	0.3
	5.52	0.6
	5.53	0.4
	5.54	0.4
	5.55	0.5
	5.56	0.5
	5.57	0.2
	5.58	1.1
	5.59	0.4
	5.6	0.3
	5.61	0.4
	5.62	0.5
	5.63	0.5
	5.64	0.6
	5.65	0.8
	5.66	0.8
	5.67	0.5
	5.68	0.3
	5.69	1.5
	5.7	0.7
	5.71	0.4
	5.72	0.7
	5.73	0.7
	5.74	0.6
	5.75	2.3
	5.76	0.8
	5.77	0.5
	5.78	1.1
	5.79	0.4
	5.8	1
	5.81	0.6
	5.82	0.3
	5.83	1.1
	5.84	0.8
	5.85	0.7
	5.86	0.3
	5.87	0.4
	5.88	0.5
	5.89	0.6
	5.9	0.6
	5.91	0.5
	5.92	0.6
	5.93	0.8
	5.94	1.1
	5.95	2.1
	5.96	0.9
	5.97	0.7
	5.98	1.2
	5.99	2.3
	6	1.1
	6.01	1.4
	6.02	0.5
	6.03	1.1
	6.04	0.3
	6.05	0.1
	6.06	0.4
	6.07	0.8
	6.08	0.4
	6.09	0.7
	6.1	0.2
	6.11	0.5
	6.12	0.3
	6.13	1.1
	6.14	1.3
	6.15	1.5
	6.16	2
	6.17	1
	6.18	0.7
	6.19	0.1
	6.2	1.1
	6.21	0.5
	6.22	0.2
	6.23	1.2
	6.24	0.3
	6.25	0.2
	6.26	0.6
	6.27	0.6
	6.28	1.9
	6.29	0.8
	6.3	1.6
	6.31	1
	6.32	0.7
	6.33	1.2
	6.34	0.5
	6.35	0.2
	6.36	1.1
	6.37	0.8
	6.38	0.5
	6.39	0.6
	6.4	0.9
	6.41	0.6
	6.42	1.4
	6.43	0.7
	6.44	0.4
	6.45	0.3
	6.46	0.5
	6.47	0.6
	6.48	1.3
	6.49	0.5
	6.5	1.1
	6.51	1.6
	6.52	0.9
	6.53	0.7
	6.54	0.5
	6.55	1.3
	6.56	1
	6.57	0.5
	6.58	0.9
	6.59	0.4
	6.6	1.1
	6.61	0.1
	6.62	0.1
	6.63	0.2
	6.64	0.5
	6.65	0.3
	6.66	0.5
	6.67	0.2
	6.68	0.4
	6.69	0.7
	6.7	0.8
	6.71	0.8
	6.72	0.6
	6.73	0.4
	6.74	0.4
	6.75	0.4
	6.76	0.5
	6.77	1.2
	6.78	0.8
	6.79	1.1
	6.8	1.4
	6.81	0.3
	6.82	0.9
	6.83	0.6
	6.84	0.3
	6.85	2
	6.86	0.8
	6.87	0.5
	6.88	0.4
	6.89	0.3
	6.9	0.3
	6.91	0.5
	6.92	0.5
	6.93	0.5
	6.94	0.2
	6.95	0.2
	6.96	0.4
	6.97	0.3
	6.98	0.2
	6.99	0.4
	7	0.1
	7.01	0.9
	7.02	0.5
	7.03	0.3
	7.04	0.3
	7.05	0.5
	7.06	0.7
	7.07	0.9
	7.08	0.4
	7.09	0.2
	7.1	0.1
	7.11	0.9
	7.12	0.6
	7.13	0.5
	7.14	0.4
	7.15	1
	7.16	0.3
	7.17	0.4
	7.18	0.8
	7.19	0.3
	7.2	0.3
	7.21	1.2
	7.22	0.6
	7.23	0.7
	7.24	0.6
	7.25	0.2
	7.26	0.2
	7.27	0.6
	7.28	0.3
	7.29	0.4
	7.3	0.9
	7.31	0.5
	7.32	0.4
	7.33	1.2
	7.34	0.3
	7.35	1.5
	7.36	2.1
	7.37	0.7
	7.38	1.3
	7.39	2.6
	7.4	0.2
	7.41	0.6
	7.42	2.7
	7.43	1
	7.44	0.5
	7.45	1.5
	7.46	0.5
	7.47	0.2
	7.48	0.6
	7.49	1.9
	7.5	1.1
	7.51	0.2
	7.52	0.1
	7.53	0.5
	7.54	0.9
	7.55	2.2
	7.56	0.3
	7.57	0.5
	7.58	0.5
	7.59	0.8
	7.6	0.6
	7.61	0.6
	7.62	0.3
	7.63	0.3
	7.64	0.1
	7.65	1
	7.66	1
	7.67	0.5
	7.68	1
	7.69	0.6
	7.7	0.8
	7.71	1
	7.72	1.5
	7.73	1.4
	7.74	1.7
	7.75	0.9
	7.76	0.5
	7.77	0.5
	7.78	0.4
	7.79	0.3
	7.8	0.3
	7.81	1.3
	7.82	0.3
	7.83	0.4
	7.84	1
	7.85	0.4
	7.86	0.8
	7.87	0.2
	7.88	0.6
	7.89	0.1
	7.9	0.3
	7.91	0.2
	7.92	0.8
	7.93	0.3
	7.94	0.2
	7.95	0.4
	7.96	0.2
	7.97	0.8
	7.98	1
	7.99	0.2
	8	0.2
	8.01	0.5
	8.02	0.7
	8.03	0.5
	8.04	0.6
	8.05	0.6
	8.06	0.8
	8.07	0.2
	8.08	0.4
	8.09	0.8
	8.1	0.4
	8.11	0.7
	8.12	2.1
	8.13	1.8
	8.14	4.4
	8.15	0.3
	8.16	0.3
	8.17	0.5
	8.18	0.3
	8.19	1
	8.2	1.1
	8.21	0.8
	8.22	1
	8.23	0.9
	8.24	1
	8.25	0.6
	8.26	0.6
	8.27	0.6
	8.28	1.1
	8.29	0.6
	8.3	0.5
	8.31	0.7
	8.32	0.2
	8.33	0.8
	8.34	0.6
	8.35	0.6
	8.36	0.7
	8.37	0.4
	8.38	0.5
	8.39	0.7
	8.4	0.7
	8.41	1.4
	8.42	0.7
	8.43	0.9
	8.44	0.3
	8.45	0.1
	8.46	0.6
	8.47	1.1
	8.48	0.5
	8.49	0.4
	8.5	0.4
	8.51	0.4
	8.52	0.4
	8.53	0.7
	8.54	0.6
	8.55	0.4
	8.56	1.6
	8.57	1
	8.58	0.6
	8.59	0.3
	8.6	1.1
	8.61	0.4
	8.62	0.4
	8.63	1
	8.64	0.8
	8.65	1.9
	8.66	0.6
	8.67	0.7
	8.68	0.8
	8.69	1.8
	8.7	3.2
	8.71	2.7
	8.72	0.8
	8.73	1
	8.74	0
	8.75	0.6
	8.76	0.9
	8.77	1.7
	8.78	0.9
	8.79	0.4
	8.8	0.8
	8.81	1.2
	8.82	1.2
	8.83	1.7
	8.84	1.3
	8.85	1.2
	8.86	2.6
	8.87	2.3
	8.88	1.2
	8.89	0.9
	8.9	1.6
	8.91	0.6
	8.92	1
	8.93	1
	8.94	1.7
	8.95	0.5
	8.96	0.2
	8.97	0.5
	8.98	1.2
	8.99	1.1
	9	0.4
	9.01	1.2
	9.02	0.1
	9.03	0.5
	9.04	0.8
	9.05	0.6
	9.06	0.8
	9.07	0.6
	9.08	0.3
	9.09	0.8
	9.1	1
	9.11	0.8
	9.12	1.5
	9.13	0.6
	9.14	1.2
	9.15	0.8
	9.16	0.8
	9.17	0.9
	9.18	2.2
	9.19	1.3
	9.2	0.4
	9.21	0.2
	9.22	0.5
	9.23	0.5
	9.24	1
	9.25	0.5
	9.26	0.4
	9.27	0.4
	9.28	1.8
	9.29	0.3
	9.3	0.3
	9.31	1
	9.32	0.2
	9.33	0.5
	9.34	1
	9.35	0.8
	9.36	1.3
	9.37	0.4
	9.38	1
	9.39	0.5
	9.4	0.6
	9.41	1.5
	9.42	0.6
	9.43	1.2
	9.44	0.5
	9.45	0.3
	9.46	0.3
	9.47	0.7
	9.48	0.7
	9.49	0.6
	9.5	1.8
	9.51	2
	9.52	1.6
	9.53	0.5
	9.54	0.7
	9.55	0.7
	9.56	0.8
	9.57	0.8
	9.58	0.5
	9.59	0.6
	9.6	1.8
	9.61	0.9
	9.62	1.4
	9.63	1
	9.64	1.1
	9.65	1.2
	9.66	0.4
	9.67	0.6
	9.68	0.7
	9.69	1.6
	9.7	1.3
	9.71	0.6
	9.72	2
	9.73	1.1
	9.74	0.9
	9.75	3.3
	9.76	1.2
	9.77	2
	9.78	1.6
	9.79	1.2
	9.8	1.7
	9.81	1.6
	9.82	1.8
	9.83	1
	9.84	0.8
	9.85	1.1
	9.86	0.7
	9.87	0.6
	9.88	1
	9.89	3.4
	9.9	1
	9.91	2
	9.92	0.4
	9.93	0.9
	9.94	1.4
	9.95	1.1
	9.96	1.5
	9.97	0.9
	9.98	0.6
	9.99	0.2
